# Supplementary material
Source: publisher figshare collection journal article supplement (https://gsajournals.figshare.com/ndownloader/files/14050523)
Supplement: Supplementary file 1 [file 14050523]

## Sheet: Sheet1
GENE	TISSUE	HK	CT_Target	CT_HK	DCT
GA13457	AG	RpS18	40	20.89	-19.11
GA13457	AG	RpS18	40	20.77	-19.23
GA13457	AG	RpS18	40	21.47	-18.53
GA13457	AG	RpS18	40	21.34	-18.66
GA14907	AG	RpS18	33.01	20.89	-12.12
GA14907	AG	RpS18	40	20.77	-19.23
GA14907	AG	RpS18	40	21.47	-18.53
GA14907	AG	RpS18	40	21.34	-18.66
GA15058	AG	RpS18	27.7	20.89	-6.81
GA15058	AG	RpS18	30.69	20.77	-9.92
GA15058	AG	RpS18	27.75	21.47	-6.28
GA15058	AG	RpS18	28.15	21.34	-6.81
GA15722	AG	RpS18	25.35	20.89	-4.46
GA15722	AG	RpS18	25	20.77	-4.23
GA15722	AG	RpS18	25.98	21.47	-4.51
GA15722	AG	RpS18	26.61	21.34	-5.27
GA17870	AG	RpS18	24.59	20.89	-3.7
GA17870	AG	RpS18	24.59	20.77	-3.82
GA17870	AG	RpS18	24.82	21.47	-3.35
GA17870	AG	RpS18	25.65	21.34	-4.31
GA18484	AG	RpS18	32.89	20.89	-12
GA18484	AG	RpS18	40	20.77	-19.23
GA18484	AG	RpS18	32.41	21.47	-10.94
GA18484	AG	RpS18	32.57	21.34	-11.23
GA18944	AG	RpS18	30.06	20.89	-9.17
GA18944	AG	RpS18	32.14	20.77	-11.37
GA18944	AG	RpS18	30.47	21.47	-9
GA18944	AG	RpS18	30.86	21.34	-9.52
GA19543	AG	RpS18	31.95	20.89	-11.06
GA19543	AG	RpS18	32	20.77	-11.23
GA19543	AG	RpS18	32.15	21.47	-10.68
GA19543	AG	RpS18	33.97	21.34	-12.63
GA20504	AG	RpS18	40	20.89	-19.11
GA20504	AG	RpS18	40	20.77	-19.23
GA20504	AG	RpS18	40	21.47	-18.53
GA20504	AG	RpS18	40	21.34	-18.66
GA21772	AG	RpS18	34.55	20.89	-13.66
GA21772	AG	RpS18	40	20.77	-19.23
GA21772	AG	RpS18	40	21.47	-18.53
GA21772	AG	RpS18	40	21.34	-18.66
GA22690	AG	RpS18	40	20.89	-19.11
GA22690	AG	RpS18	40	20.77	-19.23
GA22690	AG	RpS18	40	21.47	-18.53
GA22690	AG	RpS18	40	21.34	-18.66
GA24206	AG	RpS18	33.89	19.56	-14.33
GA24206	AG	RpS18	40	19.54	-20.46
GA24206	AG	RpS18	33.08	21.47	-11.61
GA24206	AG	RpS18	32.96	21.34	-11.62
GA24796	AG	RpS18	33.3	20.89	-12.41
GA24796	AG	RpS18	33.59	20.77	-12.82
GA24796	AG	RpS18	40	21.47	-18.53
GA24796	AG	RpS18	40	21.34	-18.66
GA25574	AG	RpS18	30.43	20.89	-9.54
GA25574	AG	RpS18	30.41	20.77	-9.64
GA25574	AG	RpS18	33.35	21.47	-11.88
GA25574	AG	RpS18	33.75	21.34	-12.41
GA26803	AG	RpS18	22.46	20.89	-1.57
GA26803	AG	RpS18	22.43	20.77	-1.66
GA26803	AG	RpS18	23.14	21.47	-1.67
GA26803	AG	RpS18	23.31	21.34	-1.97
GA27806	AG	RpS18	26.07	20.89	-5.18
GA27806	AG	RpS18	30.21	20.77	-9.44
GA27806	AG	RpS18	26.16	21.47	-4.69
GA27806	AG	RpS18	26.28	21.34	-4.94
GA28780	AG	RpS18	32.86	20.89	-11.97
GA28780	AG	RpS18	33.26	20.77	-12.49
GA28780	AG	RpS18	40	21.47	-18.53
GA28780	AG	RpS18	40	21.34	-18.66
GA30092	AG	RpS18	31.45	20.89	-10.56
GA30092	AG	RpS18	31.56	20.77	-10.79
GA30092	AG	RpS18	34.05	21.47	-12.58
GA30092	AG	RpS18	34.21	21.34	-12.87
GA30093	AG	RpS18	32.98	20.89	-12.09
GA30093	AG	RpS18	33.22	20.77	-12.45
GA30093	AG	RpS18	40	21.47	-18.53
GA30093	AG	RpS18	34.32	21.34	-12.98
GA13457	EB	RpS18	32.63	22.02	-10.61
GA13457	EB	RpS18	31.1	24.7	-6.4
GA13457	EB	RpS18	32.1	22.42	-9.68
GA13457	EB	RpS18	40	25.4	-14.6
GA14907	EB	RpS18	40	22.02	-17.98
GA14907	EB	RpS18	40	24.7	-15.3
GA14907	EB	RpS18	40	22.42	-17.58
GA14907	EB	RpS18	40	25.4	-14.6
GA15058	EB	RpS18	40	22.02	-17.98
GA15058	EB	RpS18	40	24.7	-15.3
GA15058	EB	RpS18	40	22.42	-17.58
GA15058	EB	RpS18	40	25.4	-14.6
GA15722	EB	RpS18	24.29	22.02	-2.27
GA15722	EB	RpS18	23.13	24.7	1.57
GA15722	EB	RpS18	22.95	22.42	-0.53
GA15722	EB	RpS18	25.23	25.4	0.17
GA17870	EB	RpS18	40	22.02	-17.98
GA17870	EB	RpS18	40	24.7	-15.3
GA17870	EB	RpS18	34.15	22.42	-11.73
GA17870	EB	RpS18	40	25.4	-14.6
GA18484	EB	RpS18	27.43	22.02	-5.41
GA18484	EB	RpS18	29.43	24.7	-4.73
GA18484	EB	RpS18	28.31	22.42	-5.89
GA18484	EB	RpS18	30.51	25.4	-5.11
GA18944	EB	RpS18	33.68	22.02	-11.66
GA18944	EB	RpS18	32.03	24.7	-7.33
GA18944	EB	RpS18	30.89	22.42	-8.47
GA18944	EB	RpS18	32.92	25.4	-7.52
GA19543	EB	RpS18	30.86	22.02	-8.84
GA19543	EB	RpS18	33.06	24.7	-8.36
GA19543	EB	RpS18	29.27	22.42	-6.85
GA19543	EB	RpS18	30.75	25.4	-5.35
GA20504	EB	RpS18	40	22.02	-17.98
GA20504	EB	RpS18	40	24.7	-15.3
GA20504	EB	RpS18	40	22.42	-17.58
GA20504	EB	RpS18	40	25.4	-14.6
GA21772	EB	RpS18	40	22.02	-17.98
GA21772	EB	RpS18	40	24.7	-15.3
GA21772	EB	RpS18	34.59	22.42	-12.17
GA21772	EB	RpS18	34.5	25.4	-9.1
GA22690	EB	RpS18	40	22.02	-17.98
GA22690	EB	RpS18	40	24.7	-15.3
GA22690	EB	RpS18	40	22.42	-17.58
GA22690	EB	RpS18	40	25.4	-14.6
GA24206	EB	RpS18	33.69	22.02	-11.67
GA24206	EB	RpS18	32.78	24.7	-8.08
GA24206	EB	RpS18	33.79	22.42	-11.37
GA24206	EB	RpS18	40	25.4	-14.6
GA24796	EB	RpS18	40	22.02	-17.98
GA24796	EB	RpS18	40	24.7	-15.3
GA24796	EB	RpS18	40	22.42	-17.58
GA24796	EB	RpS18	40	25.4	-14.6
GA25574	EB	RpS18	40	22.02	-17.98
GA25574	EB	RpS18	40	24.7	-15.3
GA25574	EB	RpS18	32.64	22.42	-10.22
GA25574	EB	RpS18	40	25.4	-14.6
GA26803	EB	RpS18	40	22.02	-17.98
GA26803	EB	RpS18	40	24.7	-15.3
GA26803	EB	RpS18	40	22.42	-17.58
GA26803	EB	RpS18	40	25.4	-14.6
GA27806	EB	RpS18	30.53	22.02	-8.51
GA27806	EB	RpS18	29.16	24.7	-4.46
GA27806	EB	RpS18	29.4	22.42	-6.98
GA27806	EB	RpS18	29.79	25.4	-4.39
GA28780	EB	RpS18	31.91	22.02	-9.89
GA28780	EB	RpS18	32.74	24.7	-8.04
GA28780	EB	RpS18	30.04	22.42	-7.62
GA28780	EB	RpS18	32.49	25.4	-7.09
GA30092	EB	RpS18	40	22.02	-17.98
GA30092	EB	RpS18	34.77	24.7	-10.07
GA30092	EB	RpS18	33.3	22.42	-10.88
GA30092	EB	RpS18	40	25.4	-14.6
GA30093	EB	RpS18	40	22.02	-17.98
GA30093	EB	RpS18	40	24.7	-15.3
GA30093	EB	RpS18	40	22.42	-17.58
GA30093	EB	RpS18	40	25.4	-14.6
GA13457	SV	RpS18	40	20.9	-19.1
GA13457	SV	RpS18	33.55	21.26	-12.29
GA13457	SV	RpS18	40	21.89	-18.11
GA13457	SV	RpS18	40	22.77	-17.23
GA14907	SV	RpS18	32.11	20.9	-11.21
GA14907	SV	RpS18	40	21.26	-18.74
GA14907	SV	RpS18	33.55	21.89	-11.66
GA14907	SV	RpS18	32.58	22.77	-9.81
GA15058	SV	RpS18	34.9723	22.5579	-12.4144
GA15058	SV	RpS18	32.4532	23.0095	-9.44376
GA15058	SV	RpS18	32.5938	21.8853	-10.7085
GA15058	SV	RpS18	32.0864	22.7735	-9.31294
GA15722	SV	RpS18	21.17	20.9	-0.27
GA15722	SV	RpS18	21.49	21.26	-0.23
GA15722	SV	RpS18	21.01	21.89	0.88
GA15722	SV	RpS18	21.65	22.77	1.13
GA17870	SV	RpS18	32.33	22.56	-9.77
GA17870	SV	RpS18	31.11	23.01	-8.1
GA17870	SV	RpS18	31.61	21.89	-9.72
GA17870	SV	RpS18	31.3	22.77	-8.53
GA18484	SV	RpS18	31.6075	22.5579	-9.04965
GA18484	SV	RpS18	31.3012	23.0095	-8.2917
GA18484	SV	RpS18	31.1229	21.8853	-9.23763
GA18484	SV	RpS18	31.7482	22.7735	-8.97472
GA18944	SV	RpS18	40	22.56	-17.44
GA18944	SV	RpS18	30.24	23.01	-7.23
GA18944	SV	RpS18	30.32	21.89	-8.44
GA18944	SV	RpS18	30.48	22.77	-7.71
GA19543	SV	RpS18	30.49	22.56	-7.93
GA19543	SV	RpS18	29.02	23.01	-6.01
GA19543	SV	RpS18	29.3	21.89	-7.41
GA19543	SV	RpS18	29.01	22.77	-6.24
GA20504	SV	RpS18	40	22.5579	-17.4421
GA20504	SV	RpS18	40	23.0095	-16.9905
GA20504	SV	RpS18	40	21.8853	-18.1147
GA20504	SV	RpS18	40	22.7735	-17.2265
GA21772	SV	RpS18	40	22.56	-17.44
GA21772	SV	RpS18	32.03	23.01	-9.02
GA21772	SV	RpS18	33.5503	21.8853	-11.665
GA21772	SV	RpS18	32.5798	22.7735	-9.80632
GA22690	SV	RpS18	40	22.5579	-17.4421
GA22690	SV	RpS18	40	23.0095	-16.9905
GA22690	SV	RpS18	40	21.8853	-18.1147
GA22690	SV	RpS18	40	22.7735	-17.2265
GA24206	SV	RpS18	31.2597	22.5579	-8.70187
GA24206	SV	RpS18	30.2361	23.0095	-7.22666
GA24206	SV	RpS18	30.1695	21.8853	-8.28416
GA24206	SV	RpS18	30.0308	22.7735	-7.25732
GA24796	SV	RpS18	40	22.5579	-17.4421
GA24796	SV	RpS18	40	23.0095	-16.9905
GA24796	SV	RpS18	40	21.8853	-18.1147
GA24796	SV	RpS18	40	22.7735	-17.2265
GA25574	SV	RpS18	29.51	20.9	-8.61
GA25574	SV	RpS18	29.8	21.26	-8.54
GA25574	SV	RpS18	28.31	21.89	-6.43
GA25574	SV	RpS18	29.3	22.77	-6.52
GA26803	SV	RpS18	29.1527	22.5579	-6.5948
GA26803	SV	RpS18	28.3116	23.0095	-5.30212
GA26803	SV	RpS18	29.5579	21.8853	-7.67256
GA26803	SV	RpS18	29.0095	22.7735	-6.23602
GA27806	SV	RpS18	31.256	22.5579	-8.69813
GA27806	SV	RpS18	29.2984	23.0095	-6.28895
GA27806	SV	RpS18	29.2544	21.8853	-7.36912
GA27806	SV	RpS18	29.5127	22.7735	-6.73921
GA28780	SV	RpS18	32.5798	22.5579	-10.0219
GA28780	SV	RpS18	30.3239	23.0095	-7.31446
GA28780	SV	RpS18	32.9723	21.8853	-11.087
GA28780	SV	RpS18	32.4532	22.7735	-9.67977
GA30092	SV	RpS18	30.13	20.9	-9.23
GA30092	SV	RpS18	32.32	21.26	-11.05
GA30092	SV	RpS18	31.11	21.89	-9.22
GA30092	SV	RpS18	32.03	22.77	-9.26
GA30093	SV	RpS18	27.12	20.9	-6.22
GA30093	SV	RpS18	27.11	21.26	-5.85
GA30093	SV	RpS18	27.48	21.89	-5.6
GA30093	SV	RpS18	27.09	22.77	-4.31
GA13457	Testes	RpS18	30.27	19.56	-10.71
GA13457	Testes	RpS18	28.41	19.54	-8.87
GA13457	Testes	RpS18	30.48	21.56	-8.92
GA13457	Testes	RpS18	31.14	21.11	-10.03
GA14907	Testes	RpS18	22.17	19.56	-2.61
GA14907	Testes	RpS18	21.25	19.54	-1.71
GA14907	Testes	RpS18	23.09	21.56	-1.53
GA14907	Testes	RpS18	23.64	21.11	-2.53
GA15058	Testes	RpS18	34.25	19.56	-14.69
GA15058	Testes	RpS18	33.09	19.54	-13.55
GA15058	Testes	RpS18	40	21.56	-18.44
GA15058	Testes	RpS18	40	21.11	-18.89
GA15722	Testes	RpS18	21.19	19.56	-1.63
GA15722	Testes	RpS18	22.4	19.54	-2.86
GA15722	Testes	RpS18	23.59	21.56	-2.03
GA15722	Testes	RpS18	23.2	21.11	-2.09
GA17870	Testes	RpS18	33.11	19.56	-13.55
GA17870	Testes	RpS18	31.65	19.54	-12.11
GA17870	Testes	RpS18	28.98	21.56	-7.42
GA17870	Testes	RpS18	34.66	21.11	-13.55
GA18484	Testes	RpS18	28.31	19.56	-8.75
GA18484	Testes	RpS18	28.25	19.54	-8.71
GA18484	Testes	RpS18	29.47	21.56	-7.91
GA18484	Testes	RpS18	29.76	21.11	-8.65
GA18944	Testes	RpS18	28.98	19.56	-9.42
GA18944	Testes	RpS18	27.6	19.54	-8.06
GA18944	Testes	RpS18	30.3	21.56	-8.74
GA18944	Testes	RpS18	29.85	21.11	-8.74
GA19543	Testes	RpS18	27.35	19.56	-7.79
GA19543	Testes	RpS18	26.3	19.54	-6.76
GA19543	Testes	RpS18	29.76	21.56	-8.2
GA19543	Testes	RpS18	28.39	21.11	-7.28
GA20504	Testes	RpS18	26.83	19.56	-7.27
GA20504	Testes	RpS18	25.45	19.54	-5.91
GA20504	Testes	RpS18	27.36	21.56	-5.8
GA20504	Testes	RpS18	28.26	21.11	-7.15
GA21772	Testes	RpS18	30.17	19.56	-10.61
GA21772	Testes	RpS18	29.73	19.54	-10.19
GA21772	Testes	RpS18	31.24	21.56	-9.68
GA21772	Testes	RpS18	32	21.11	-10.89
GA22690	Testes	RpS18	29.15	19.56	-9.59
GA22690	Testes	RpS18	27.5	19.54	-7.96
GA22690	Testes	RpS18	29.21	21.56	-7.65
GA22690	Testes	RpS18	30.64	21.11	-9.53
GA24206	Testes	RpS18	29.09	19.56	-9.53
GA24206	Testes	RpS18	29.37	19.54	-9.83
GA24206	Testes	RpS18	30.35	21.56	-8.79
GA24206	Testes	RpS18	29.96	21.11	-8.85
GA24796	Testes	RpS18	24.31	19.56	-4.75
GA24796	Testes	RpS18	23.9	19.54	-4.36
GA24796	Testes	RpS18	25.3	21.56	-3.74
GA24796	Testes	RpS18	25.47	21.11	-4.36
GA25574	Testes	RpS18	19.68	19.56	-0.12
GA25574	Testes	RpS18	19.68	19.54	-0.14
GA25574	Testes	RpS18	20.58	21.56	0.98
GA25574	Testes	RpS18	20.51	21.11	0.6
GA26803	Testes	RpS18	31.76	19.56	-12.2
GA26803	Testes	RpS18	31.26	19.54	-11.72
GA26803	Testes	RpS18	34.25	21.56	-12.69
GA26803	Testes	RpS18	34.7	21.11	-13.59
GA27806	Testes	RpS18	29.67	19.56	-10.11
GA27806	Testes	RpS18	29.67	19.54	-10.13
GA27806	Testes	RpS18	30.66	21.56	-9.1
GA27806	Testes	RpS18	31.65	21.11	-10.54
GA28780	Testes	RpS18	26.58	19.56	-7.02
GA28780	Testes	RpS18	25.56	19.54	-6.02
GA28780	Testes	RpS18	27.35	21.56	-5.79
GA28780	Testes	RpS18	27.45	21.11	-6.34
GA30092	Testes	RpS18	20.68	19.56	-1.12
GA30092	Testes	RpS18	19.85	19.54	-0.31
GA30092	Testes	RpS18	21.99	21.56	-0.43
GA30092	Testes	RpS18	22.03	21.11	-0.92
GA30093	Testes	RpS18	22.01	19.56	-2.45
GA30093	Testes	RpS18	22.81	19.54	-3.27
GA30093	Testes	RpS18	23.5	21.56	-1.94
GA30093	Testes	RpS18	23.63	21.11	-2.52
GA13457	AG	RpL32	40	20.6	-19.4
GA13457	AG	RpL32	40	21.33	-18.67
GA13457	AG	RpL32	40	21.34	-18.66
GA13457	AG	RpL32	40	21.87	-18.13
GA14907	AG	RpL32	33.01	20.6	-12.41
GA14907	AG	RpL32	40	21.33	-18.67
GA14907	AG	RpL32	40	21.34	-18.66
GA14907	AG	RpL32	40	21.87	-18.13
GA15058	AG	RpL32	27.7	19.63	-8.06
GA15058	AG	RpL32	30.69	19.12	-11.57
GA15058	AG	RpL32	27.75	21.31	-6.44
GA15058	AG	RpL32	28.15	22.24	-5.91
GA15722	AG	RpL32	25.35	20.6	-4.75
GA15722	AG	RpL32	25	21.33	-3.67
GA15722	AG	RpL32	25.98	21.34	-4.64
GA15722	AG	RpL32	26.61	21.87	-4.74
GA17870	AG	RpL32	24.59	20.6	-3.99
GA17870	AG	RpL32	24.59	21.33	-3.26
GA17870	AG	RpL32	24.82	21.34	-3.48
GA17870	AG	RpL32	25.65	21.87	-3.78
GA18484	AG	RpL32	32.89	19.63	-13.26
GA18484	AG	RpL32	40	19.12	-20.88
GA18484	AG	RpL32	32.41	21.31	-11.1
GA18484	AG	RpL32	32.57	22.24	-10.33
GA18944	AG	RpL32	30.06	20.6	-9.46
GA18944	AG	RpL32	32.14	21.33	-10.81
GA18944	AG	RpL32	30.47	21.34	-9.13
GA18944	AG	RpL32	30.86	21.87	-8.99
GA19543	AG	RpL32	31.95	20.6	-11.35
GA19543	AG	RpL32	32	21.33	-10.67
GA19543	AG	RpL32	32.15	21.34	-10.81
GA19543	AG	RpL32	33.97	21.87	-12.1
GA20504	AG	RpL32	40	19.63	-20.37
GA20504	AG	RpL32	40	19.12	-20.88
GA20504	AG	RpL32	40	21.31	-18.69
GA20504	AG	RpL32	40	22.24	-17.76
GA21772	AG	RpL32	34.55	19.63	-14.92
GA21772	AG	RpL32	40	19.12	-20.88
GA21772	AG	RpL32	40	21.31	-18.69
GA21772	AG	RpL32	40	22.24	-17.76
GA22690	AG	RpL32	40	19.63	-20.37
GA22690	AG	RpL32	40	19.12	-20.88
GA22690	AG	RpL32	40	21.31	-18.69
GA22690	AG	RpL32	40	22.24	-17.76
GA24206	AG	RpL32	33.89	19.63	-14.26
GA24206	AG	RpL32	40	19.12	-20.88
GA24206	AG	RpL32	33.08	21.31	-11.77
GA24206	AG	RpL32	32.96	22.24	-10.72
GA24796	AG	RpL32	33.3	19.63	-13.67
GA24796	AG	RpL32	33.59	19.12	-14.47
GA24796	AG	RpL32	40	21.31	-18.69
GA24796	AG	RpL32	40	22.24	-17.76
GA25574	AG	RpL32	30.43	19.63	-10.8
GA25574	AG	RpL32	30.41	19.12	-11.28
GA25574	AG	RpL32	33.35	21.31	-12.04
GA25574	AG	RpL32	33.75	22.24	-11.51
GA26803	AG	RpL32	22.46	19.63	-2.82
GA26803	AG	RpL32	22.43	19.12	-3.31
GA26803	AG	RpL32	23.14	21.31	-1.83
GA26803	AG	RpL32	23.31	22.24	-1.07
GA27806	AG	RpL32	26.07	19.63	-6.44
GA27806	AG	RpL32	30.21	19.12	-11.08
GA27806	AG	RpL32	26.16	21.31	-4.85
GA27806	AG	RpL32	26.28	22.24	-4.04
GA28780	AG	RpL32	32.86	19.63	-13.22
GA28780	AG	RpL32	33.26	19.12	-14.14
GA28780	AG	RpL32	40	21.31	-18.69
GA28780	AG	RpL32	40	22.24	-17.76
GA30092	AG	RpL32	31.45	19.63	-11.82
GA30092	AG	RpL32	31.56	19.12	-12.44
GA30092	AG	RpL32	34.05	21.31	-12.74
GA30092	AG	RpL32	34.21	22.24	-11.97
GA30093	AG	RpL32	32.98	19.63	-13.35
GA30093	AG	RpL32	33.22	19.12	-14.09
GA30093	AG	RpL32	40	21.31	-18.69
GA30093	AG	RpL32	34.32	22.24	-12.08
GA13457	EB	RpL32	32.63	21.5	-11.13
GA13457	EB	RpL32	31.1	24.03	-7.07
GA13457	EB	RpL32	32.1	22.04	-10.06
GA13457	EB	RpL32	40	25.12	-14.88
GA14907	EB	RpL32	40	21.5	-18.5
GA14907	EB	RpL32	40	24.03	-15.97
GA14907	EB	RpL32	40	22.04	-17.96
GA14907	EB	RpL32	40	25.12	-14.88
GA15058	EB	RpL32	40	21.5	-18.5
GA15058	EB	RpL32	40	24.03	-15.97
GA15058	EB	RpL32	40	22.04	-17.96
GA15058	EB	RpL32	40	25.12	-14.88
GA15722	EB	RpL32	24.29	21.5	-2.79
GA15722	EB	RpL32	23.13	24.03	0.9
GA15722	EB	RpL32	22.95	22.04	-0.91
GA15722	EB	RpL32	25.23	25.12	-0.11
GA17870	EB	RpL32	40	21.5	-18.5
GA17870	EB	RpL32	40	24.03	-15.97
GA17870	EB	RpL32	34.15	22.04	-12.11
GA17870	EB	RpL32	40	25.12	-14.88
GA18484	EB	RpL32	27.43	21.5	-5.93
GA18484	EB	RpL32	29.43	24.03	-5.4
GA18484	EB	RpL32	28.31	22.04	-6.27
GA18484	EB	RpL32	30.51	25.12	-5.39
GA18944	EB	RpL32	33.68	21.5	-12.18
GA18944	EB	RpL32	32.03	24.03	-8
GA18944	EB	RpL32	30.89	22.04	-8.85
GA18944	EB	RpL32	32.92	25.12	-7.8
GA19543	EB	RpL32	30.86	21.5	-9.36
GA19543	EB	RpL32	33.06	24.03	-9.03
GA19543	EB	RpL32	29.27	22.04	-7.23
GA19543	EB	RpL32	30.75	25.12	-5.63
GA20504	EB	RpL32	40	21.5	-18.5
GA20504	EB	RpL32	40	24.03	-15.97
GA20504	EB	RpL32	40	22.04	-17.96
GA20504	EB	RpL32	40	25.12	-14.88
GA21772	EB	RpL32	40	21.5	-18.5
GA21772	EB	RpL32	40	24.03	-15.97
GA21772	EB	RpL32	34.59	22.04	-12.55
GA21772	EB	RpL32	34.5	25.12	-9.38
GA22690	EB	RpL32	40	21.5	-18.5
GA22690	EB	RpL32	40	24.03	-15.97
GA22690	EB	RpL32	40	22.04	-17.96
GA22690	EB	RpL32	40	25.12	-14.88
GA24206	EB	RpL32	33.69	21.5	-12.19
GA24206	EB	RpL32	32.78	24.03	-8.75
GA24206	EB	RpL32	33.79	22.04	-11.75
GA24206	EB	RpL32	40	25.12	-14.88
GA24796	EB	RpL32	40	21.5	-18.5
GA24796	EB	RpL32	40	24.03	-15.97
GA24796	EB	RpL32	40	22.04	-17.96
GA24796	EB	RpL32	40	25.12	-14.88
GA25574	EB	RpL32	40	21.5	-18.5
GA25574	EB	RpL32	40	24.03	-15.97
GA25574	EB	RpL32	32.64	22.04	-10.6
GA25574	EB	RpL32	40	25.12	-14.88
GA26803	EB	RpL32	40	21.5	-18.5
GA26803	EB	RpL32	40	24.03	-15.97
GA26803	EB	RpL32	40	22.04	-17.96
GA26803	EB	RpL32	40	25.12	-14.88
GA27806	EB	RpL32	30.53	21.5	-9.03
GA27806	EB	RpL32	29.16	24.03	-5.13
GA27806	EB	RpL32	29.4	22.04	-7.36
GA27806	EB	RpL32	29.79	25.12	-4.67
GA28780	EB	RpL32	31.91	21.5	-10.41
GA28780	EB	RpL32	32.74	24.03	-8.71
GA28780	EB	RpL32	30.04	22.04	-8
GA28780	EB	RpL32	32.49	25.12	-7.37
GA30092	EB	RpL32	40	21.5	-18.5
GA30092	EB	RpL32	34.77	24.03	-10.74
GA30092	EB	RpL32	33.3	22.04	-11.26
GA30092	EB	RpL32	40	25.12	-14.88
GA30093	EB	RpL32	40	21.5	-18.5
GA30093	EB	RpL32	40	24.03	-15.97
GA30093	EB	RpL32	40	22.04	-17.96
GA30093	EB	RpL32	40	25.12	-14.88
GA13457	SV	RpL32	40	20.81	-19.19
GA13457	SV	RpL32	33.55	20.51	-13.04
GA13457	SV	RpL32	40	20.31	-19.69
GA13457	SV	RpL32	40	20.24	-19.76
GA14907	SV	RpL32	32.11	20.81	-11.3
GA14907	SV	RpL32	40	20.51	-19.49
GA14907	SV	RpL32	33.55	20.31	-13.24
GA14907	SV	RpL32	32.58	20.24	-12.34
GA15058	SV	RpL32	34.9723	23.1229	-11.8493
GA15058	SV	RpL32	32.4532	22.6482	-9.80506
GA15058	SV	RpL32	32.5938	20.31	-12.2838
GA15058	SV	RpL32	32.0864	20.24	-11.8464
GA15722	SV	RpL32	21.17	20.81	-0.35
GA15722	SV	RpL32	21.49	20.51	-0.98
GA15722	SV	RpL32	21.01	20.31	-0.7
GA15722	SV	RpL32	21.65	20.24	-1.41
GA17870	SV	RpL32	32.33	23.12	-9.21
GA17870	SV	RpL32	31.11	22.65	-8.46
GA17870	SV	RpL32	31.61	20.31	-11.3
GA17870	SV	RpL32	31.3	20.24	-11.06
GA18484	SV	RpL32	31.6075	23.1229	-8.48458
GA18484	SV	RpL32	31.3012	22.6482	-8.653
GA18484	SV	RpL32	31.1229	20.31	-10.8129
GA18484	SV	RpL32	31.7482	20.24	-11.5082
GA18944	SV	RpL32	40	23.12	-16.88
GA18944	SV	RpL32	30.24	22.65	-7.6
GA18944	SV	RpL32	30.32	20.31	-10.01
GA18944	SV	RpL32	30.48	20.24	-10.24
GA19543	SV	RpL32	30.49	23.12	-7.36
GA19543	SV	RpL32	29.02	22.65	-6.37
GA19543	SV	RpL32	29.3	20.31	-8.99
GA19543	SV	RpL32	29.01	20.24	-8.77
GA20504	SV	RpL32	40	23.1229	-16.8771
GA20504	SV	RpL32	40	22.6482	-17.3518
GA20504	SV	RpL32	40	20.31	-19.69
GA20504	SV	RpL32	40	20.24	-19.76
GA21772	SV	RpL32	40	23.12	-16.88
GA21772	SV	RpL32	32.03	22.65	-9.38
GA21772	SV	RpL32	33.5503	20.31	-13.2403
GA21772	SV	RpL32	32.5798	20.24	-12.3398
GA22690	SV	RpL32	40	23.1229	-16.8771
GA22690	SV	RpL32	40	22.6482	-17.3518
GA22690	SV	RpL32	40	20.31	-19.69
GA22690	SV	RpL32	40	20.24	-19.76
GA24206	SV	RpL32	31.2597	23.1229	-8.13679
GA24206	SV	RpL32	30.2361	22.6482	-7.58796
GA24206	SV	RpL32	30.1695	20.31	-9.85947
GA24206	SV	RpL32	30.0308	20.24	-9.79078
GA24796	SV	RpL32	40	23.1229	-16.8771
GA24796	SV	RpL32	40	22.6482	-17.3518
GA24796	SV	RpL32	40	20.31	-19.69
GA24796	SV	RpL32	40	20.24	-19.76
GA25574	SV	RpL32	29.51	20.81	-8.69
GA25574	SV	RpL32	29.8	20.51	-9.29
GA25574	SV	RpL32	28.31	20.31	-8
GA25574	SV	RpL32	29.3	20.24	-9.06
GA26803	SV	RpL32	29.1527	23.1229	-6.02973
GA26803	SV	RpL32	28.3116	22.6482	-5.66342
GA26803	SV	RpL32	29.5579	20.31	-9.24787
GA26803	SV	RpL32	29.0095	20.24	-8.76948
GA27806	SV	RpL32	31.256	23.1229	-8.13305
GA27806	SV	RpL32	29.2984	22.6482	-6.65025
GA27806	SV	RpL32	29.2544	20.31	-8.94443
GA27806	SV	RpL32	29.5127	20.24	-9.27267
GA28780	SV	RpL32	32.5798	23.1229	-9.45684
GA28780	SV	RpL32	30.3239	22.6482	-7.67576
GA28780	SV	RpL32	32.9723	20.31	-12.6623
GA28780	SV	RpL32	32.4532	20.24	-12.2132
GA30092	SV	RpL32	30.13	20.81	-9.31
GA30092	SV	RpL32	32.32	20.51	-11.8
GA30092	SV	RpL32	31.11	20.31	-10.8
GA30092	SV	RpL32	32.03	20.24	-11.79
GA30093	SV	RpL32	27.12	20.81	-6.3
GA30093	SV	RpL32	27.11	20.51	-6.59
GA30093	SV	RpL32	27.48	20.31	-7.17
GA30093	SV	RpL32	27.09	20.24	-6.85
GA13457	Testes	RpL32	30.27	19.63	-10.64
GA13457	Testes	RpL32	28.41	19.12	-9.29
GA13457	Testes	RpL32	30.48	21.31	-9.17
GA13457	Testes	RpL32	31.14	22.24	-8.9
GA14907	Testes	RpL32	22.17	19.63	-2.54
GA14907	Testes	RpL32	21.25	19.12	-2.13
GA14907	Testes	RpL32	23.09	21.31	-1.78
GA14907	Testes	RpL32	23.64	22.24	-1.4
GA15058	Testes	RpL32	34.25	19.63	-14.61
GA15058	Testes	RpL32	33.09	19.12	-13.97
GA15058	Testes	RpL32	40	21.31	-18.69
GA15058	Testes	RpL32	40	22.24	-17.76
GA15722	Testes	RpL32	21.19	19.63	-1.56
GA15722	Testes	RpL32	22.4	19.12	-3.27
GA15722	Testes	RpL32	23.59	21.31	-2.28
GA15722	Testes	RpL32	23.2	22.24	-0.96
GA17870	Testes	RpL32	33.11	19.63	-13.47
GA17870	Testes	RpL32	31.65	19.12	-12.53
GA17870	Testes	RpL32	28.98	21.31	-7.67
GA17870	Testes	RpL32	34.66	22.24	-12.42
GA18484	Testes	RpL32	28.31	19.63	-8.68
GA18484	Testes	RpL32	28.25	19.12	-9.12
GA18484	Testes	RpL32	29.47	21.31	-8.16
GA18484	Testes	RpL32	29.76	22.24	-7.52
GA18944	Testes	RpL32	28.98	19.63	-9.35
GA18944	Testes	RpL32	27.6	19.12	-8.48
GA18944	Testes	RpL32	30.3	21.31	-8.99
GA18944	Testes	RpL32	29.85	22.24	-7.61
GA19543	Testes	RpL32	27.35	19.63	-7.72
GA19543	Testes	RpL32	26.3	19.12	-7.18
GA19543	Testes	RpL32	29.76	21.31	-8.45
GA19543	Testes	RpL32	28.39	22.24	-6.15
GA20504	Testes	RpL32	26.83	19.63	-7.2
GA20504	Testes	RpL32	25.45	19.12	-6.33
GA20504	Testes	RpL32	27.36	21.31	-6.05
GA20504	Testes	RpL32	28.26	22.24	-6.02
GA21772	Testes	RpL32	30.17	19.63	-10.54
GA21772	Testes	RpL32	29.73	19.12	-10.6
GA21772	Testes	RpL32	31.24	21.31	-9.93
GA21772	Testes	RpL32	32	22.24	-9.76
GA22690	Testes	RpL32	29.15	19.63	-9.52
GA22690	Testes	RpL32	27.5	19.12	-8.37
GA22690	Testes	RpL32	29.21	21.31	-7.9
GA22690	Testes	RpL32	30.64	22.24	-8.4
GA24206	Testes	RpL32	29.09	19.63	-9.46
GA24206	Testes	RpL32	29.37	19.12	-10.24
GA24206	Testes	RpL32	30.35	21.31	-9.04
GA24206	Testes	RpL32	29.96	22.24	-7.72
GA24796	Testes	RpL32	24.31	19.63	-4.68
GA24796	Testes	RpL32	23.9	19.12	-4.77
GA24796	Testes	RpL32	25.3	21.31	-3.99
GA24796	Testes	RpL32	25.47	22.24	-3.23
GA25574	Testes	RpL32	19.68	19.63	-0.05
GA25574	Testes	RpL32	19.68	19.12	-0.56
GA25574	Testes	RpL32	20.58	21.31	0.73
GA25574	Testes	RpL32	20.51	22.24	1.73
GA26803	Testes	RpL32	31.76	19.63	-12.13
GA26803	Testes	RpL32	31.26	19.12	-12.14
GA26803	Testes	RpL32	34.25	21.31	-12.94
GA26803	Testes	RpL32	34.7	22.24	-12.46
GA27806	Testes	RpL32	29.67	19.63	-10.04
GA27806	Testes	RpL32	29.67	19.12	-10.55
GA27806	Testes	RpL32	30.66	21.31	-9.35
GA27806	Testes	RpL32	31.65	22.24	-9.41
GA28780	Testes	RpL32	26.58	19.63	-6.95
GA28780	Testes	RpL32	25.56	19.12	-6.43
GA28780	Testes	RpL32	27.35	21.31	-6.04
GA28780	Testes	RpL32	27.45	22.24	-5.21
GA30092	Testes	RpL32	20.68	19.63	-1.04
GA30092	Testes	RpL32	19.85	19.12	-0.73
GA30092	Testes	RpL32	21.99	21.31	-0.68
GA30092	Testes	RpL32	22.03	22.24	0.21
GA30093	Testes	RpL32	22.01	19.63	-2.38
GA30093	Testes	RpL32	22.81	19.12	-3.68
GA30093	Testes	RpL32	23.5	21.31	-2.19
GA30093	Testes	RpL32	23.63	22.24	-1.39
